# Supplementary material
Source: PubMed Central journal article supplement (PMC4576685)
Supplement: supp_mol.114.097527_Supplementary_figures_97527.pdf [file supp_mol.114.097527_Supplementary_figures_97527.pdf]

Supplementary information for: "Agonist binding and desensitization of the mu-opioid receptor is modulated by phosphorylation of the C-terminal tail domain."

Birdsong W.T., Arttamangkul S., Bunzo W.J.R., Williams J.T., *Molecular Pharmacology*, 2015

Figure S1

A 100 nM derm 594

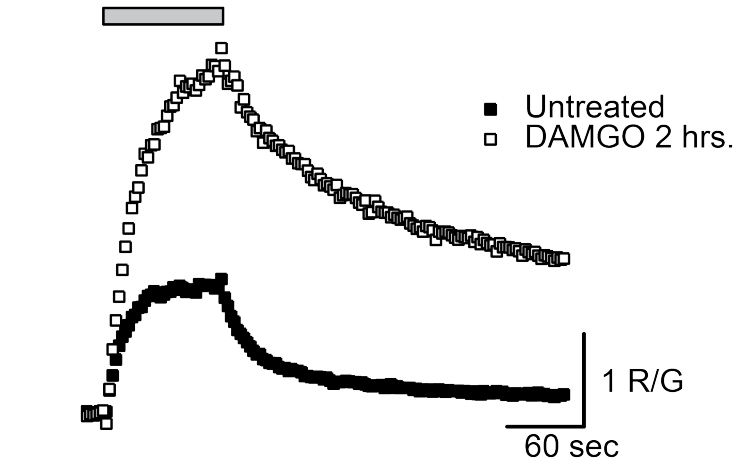

B

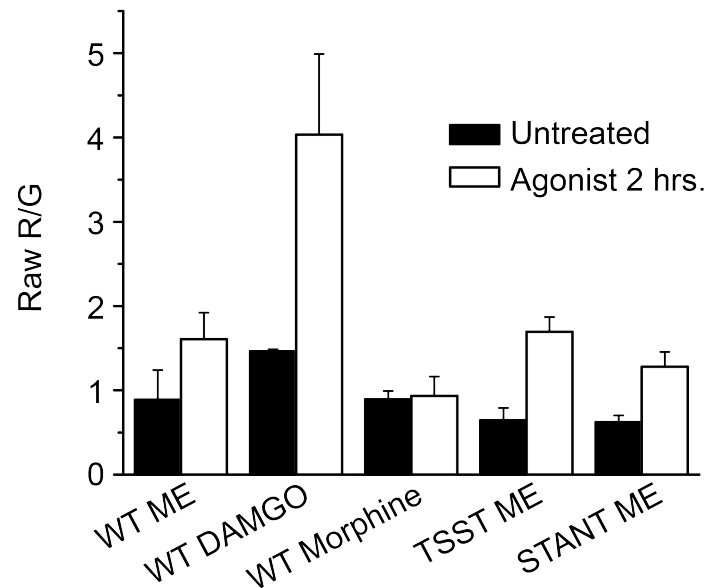

Figure S1: A) Derma594 (100 nM) was applied to either untreated or DAMGO (10 $\mu$ M, 2 hrs) treated HEK293 cells expressing FLAG-MOPr labeled with M1-A488. The intensity of Derma594 (red) and M1-A488 (green) were measured every 2.5 seconds before, during and following a 90 second application of Derma594. The relative non-normalized Derma594: M1-A488 intensity (R/G) is plotted demonstrating more binding of Derma594 following DAMGO treatment. B) Summarized data showing the raw R/G data for WT FLAG-MOPr treated with ME, DAMGO and morphine and TSST-4A and STANT-3A mutants treated with ME demonstrate that under all conditions there was at least as much binding of Derma594 to MOPr following agonist pretreatment. Raw R/G values represent fluorescence intensity and therefore do not represent an actual ratio of ligand: receptor. The true ratio of Derma594: MOPr is not known.

Figure S2

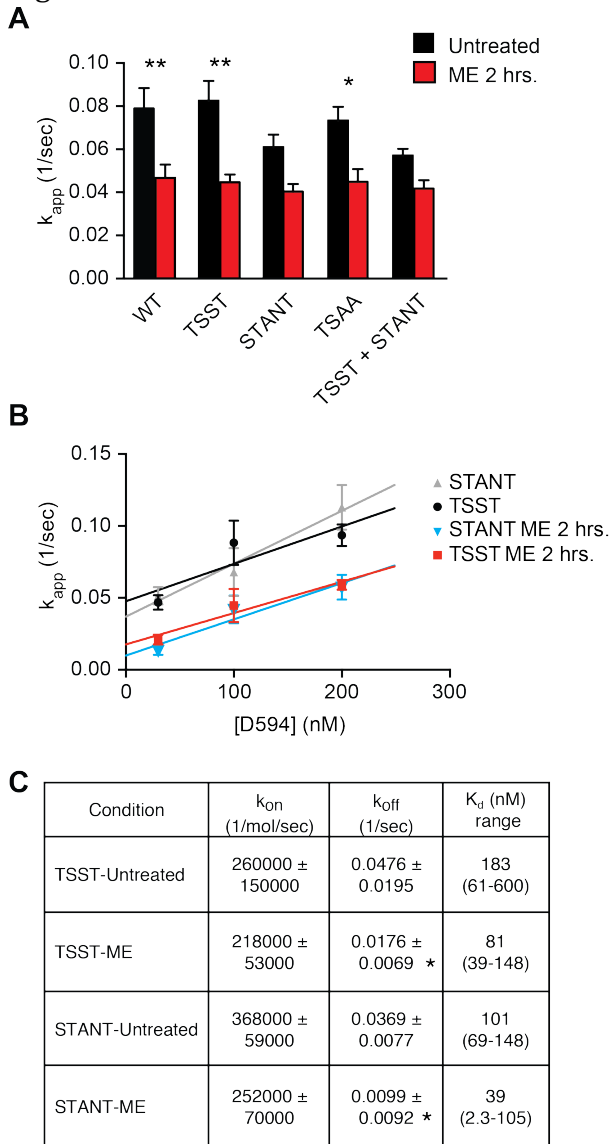

Figure S2: A) the apparent association rate ( $k_{app}$ ) of DermaA594 (100 nM) was measured by fitting the DermaA594 : M1-A488 fluorescence intensity during a 90 second application of DermaA594 with a single exponential function to get an apparent rate of association ( $k_{app}$ ). Averages from untreated and ME treated (30 $\mu$ M, 2 hrs) cells are plotted (+/- s.e.m.). There was a significant slowing in the  $k_{app}$  following ME treatment in WT, TSST, and TSAA mutants (\*  $p < .05$ , \*\*  $p < .01$ , two-way ANOVA, Tukey's post hoc). When STANT was mutated, the  $k_{app}$  was not significantly changed following ME treatment primarily due to slower  $k_{app}$  under untreated conditions. B)  $k_{app}$  was measured for STANT-3A and TSST-4A mutants as described above during 3 minute applications of DermaA594 at 30, 100, and 200 nM concentrations. Apparent on rates under each condition were plotted and fit linearly to estimate binding affinity ( $k_d$ ). ME treatment resulted in a significant change in  $k_{app}$  in both TSST and STANT ( $p < 0.001$  for TSST vs. TSST+ME and STANT vs. STANT+ME, two way ANOVA, Tukey's post hoc). C) Summary of best fit of data from "B" where  $k_{on}$  was the slope and  $k_{off}$  was the y-intercept. (best fit +/- S.D.;\*,  $p < 0.05$  ME vs. untreated,  $K_d$  range calculated from S.D. of  $k_{off}$  and  $k_{on}$ )
